Table S1. Estimates of repeatability of metabolic rate for a range of animals

| Variable | Repeatability | N   | Interval (days) | Animal     | Group     | Reference                    |
|----------|---------------|-----|-----------------|------------|-----------|------------------------------|
| MMR      | 0.538         | 50  | 2               | Reptile    | Ectotherm | Garland and Else, 1987       |
| RMR      | 0.796         | 242 | 1               | Reptile    | Ectotherm | Garland and Bennett, 1990    |
| RMR      | 0.38          | 23  | 2.5             | Insect     | Ectotherm | Chappell and Rogowitz, 2000  |
| MMR      | 0.64          | 22  | 2               | Insect     | Ectotherm | Rogowitz and Chappell, 2000  |
| MMR      | 0.64          | 22  | 4               | Insect     | Ectotherm | Rogowitz and Chappell, 2000  |
| MMR      | 0.69          | 22  | 2               | Insect     | Ectotherm | Rogowitz and Chappell, 2000  |
| MMR      | 0.067         | 21  | 2               | Insect     | Ectotherm | Rogowitz and Chappell, 2000  |
| MMR      | 0.63          | 21  | 4               | Insect     | Ectotherm | Rogowitz and Chappell, 2000  |
| MMR      | 0.19          | 21  | 2               | Insect     | Ectotherm | Rogowitz and Chappell, 2000  |
| RMR      | 0.53          | 85  | 30              | Insect     | Ectotherm | Nespolo et al., 2003         |
| RMR      | 0.22          | 13  | 25              | Insect     | Ectotherm | Marais and Chown, 2003       |
| RMR      | 0.28          | 7   | 0.3             | Insect     | Ectotherm | Terblanche et al., 2004      |
| RMR      | 0.37          | 7   | 0.3             | Insect     | Ectotherm | Terblanche et al., 2004      |
| RMR      | 0.87          | 7   | 0.3             | Insect     | Ectotherm | Terblanche et al., 2004      |
| RMR      | 0.93          | 7   | 0.3             | Insect     | Ectotherm | Terblanche et al., 2004      |
| RMR      | 0.41          | 6   | 0.3             | Insect     | Ectotherm | Terblanche et al., 2004      |
| RMR      | 0.08          | 7   | 0.3             | Insect     | Ectotherm | Terblanche et al., 2004      |
| RMR      | 0.89          | 7   | 0.3             | Insect     | Ectotherm | Terblanche et al., 2004      |
| RMR      | 0.85          | 7   | 0.3             | Insect     | Ectotherm | Terblanche et al., 2004      |
| RMR      | 0.60          | 7   | 0.3             | Insect     | Ectotherm | Terblanche et al., 2004      |
| RMR      | 0.67          | 6   | 0.3             | Insect     | Ectotherm | Terblanche et al., 2004      |
| RMR      | 0.68          | 26  | 30              | Fish       | Ectotherm | Maciak and Konarzewski, 2010 |
| RMR      | 0.017         | 30  | 183             | Fish       | Ectotherm | Seppänen et al., 2010        |
| RMR      | 0.314         | 24  | 244             | Fish       | Ectotherm | Seppänen et al., 2010        |
| RMR      | 0.255         | 29  | 29              | Insect     | Ectotherm | Schimpf et al, unpublished   |
| RMR      | 0.121         | 34  | 39.8            | Insect     | Ectotherm | Schimpf et al, unpublished   |
| RMR      | 0.121         | 86  | 94.7            | Insect     | Ectotherm | Schimpf et al, unpublished   |
| RMR      | 0.057         | 32  | 51.875          | Insect     | Ectotherm | Schimpf et al, unpublished   |
| RMR      | 0.625         | 17  | 1               | Insect     | Ectotherm | Schimpf et al, unpublished   |
| RMR      | 0.61          | 15  | 152.5           | Arachnid   | Ectotherm | Lardies et al., 2008         |
| RMR      | 0.38          | 44  | 15              | Snail      | Ectotherm | Artacho and Nespolo, 2009    |
| RMR      | 0.25          | 33  | 15              | Snail      | Ectotherm | Artacho and Nespolo, 2009    |
| RMR      | 0.569         | 33  | 35              | Fish       | Ectotherm | Norin and Malte, 2011        |
| RMR      | 0.579         | 33  | 35              | Fish       | Ectotherm | Norin and Malte, 2011        |
| RMR      | 0.517         | 33  | 35              | Fish       | Ectotherm | Norin and Malte, 2011        |
| RMR      | 0.163         | 33  | 70              | Fish       | Ectotherm | Norin and Malte, 2011        |
| RMR      | 0.416         | 33  | 70              | Fish       | Ectotherm | Norin and Malte, 2011        |
| RMR      | 0.093         | 33  | 105             | Fish       | Ectotherm | Norin and Malte, 2011        |
| MMR      | 0.316         | 33  | 35              | Fish       | Ectotherm | Norin and Malte, 2011        |
| MMR      | 0.362         | 33  | 35              | Fish       | Ectotherm | Norin and Malte, 2011        |
| MMR      | 0.38          | 33  | 35              | Fish       | Ectotherm | Norin and Malte, 2011        |
| MMR      | 0.253         | 33  | 70              | Fish       | Ectotherm | Norin and Malte, 2011        |
| MMR      | 0.346         | 33  | 70              | Fish       | Ectotherm | Norin and Malte, 2011        |
| MMR      | 0.225         | 33  | 105             | Fish       | Ectotherm | Norin and Malte, 2011        |
| MMR      | 0.787         | 61  | 1               | Mammal (L) | Endotherm | Hayes et al., 1992           |
| MMR      | 0.4           | 50  | 11.5            | Mammal (W) | Endotherm | Chappell and Bachman, 1995   |
| MMR      | 0.38          | 34  | 11.5            | Mammal (W) | Endotherm | Chappell and Bachman, 1995   |
| MMR      | 0.47          | 21  | 547.5           | Mammal (W) | Endotherm | Chappell and Bachman, 1995   |
| MMR      | 0.02          | 19  | 547.5           | Mammal (W) | Endotherm | Chappell and Bachman, 1995   |
| FMR      | 0.261         | 11  | 42              | Mammal (W) | Endotherm | Berteaux et al., 1996        |
| RMR      | 0.69          | 30  | 21              | Mammal (W) | Endotherm | Hayes et al., 1998           |
| MMR      | 0.39          | 34  | 68              | Mammal (W) | Endotherm | Hayes and O'Conner, 1999     |
| RMR      | 0.35          | 17  | 30.3            | Bird       | Endotherm | Bech et al., 1999            |
| FMR      | 0.64          | 32  | 1               | Bird       | Endotherm | Fyhn et al., 2001            |
| RMR      | 0.86          | 28  | 4               | Bird       | Endotherm | Hörak et al., 2002           |
| RMR      | 0.87          | 28  | 8               | Bird       | Endotherm | Hörak et al., 2002           |
| RMR      | 0.63          | 14  | 120             | Bird       | Endotherm | Hörak et al., 2002           |
| RMR      | 0.56          | 64  | 30              | Mammal (W) | Endotherm | Labocha et al., 2004         |
| MMR      | 0.64          | 41  | 1               | Mammal (L) | Endotherm | Chappell et al., 2004        |
| MMR      | 0.77          | 16  | 2               | Mammal (L) | Endotherm | Chappell et al., 2004        |
| MMR      | 0.74          | 7   | 3               | Mammal (L) | Endotherm | Chappell et al., 2004        |
| RMR      | 0.62          | 41  | 1               | Mammal (L) | Endotherm | Chappell et al., 2004        |
| RMR      | 0.55          | 16  | 2               | Mammal (L) | Endotherm | Chappell et al., 2004        |
| RMR      | 0.71          | 7   | 3               | Mammal (L) | Endotherm | Chappell et al., 2004        |
| MMR      | 0.792         | 19  | 28              | Mammal (L) | Endotherm | Rezende et al., 2004         |
| MMR      | 0.78          | 19  | 56              | Mammal (L) | Endotherm | Rezende et al., 2004         |
| MMR      | 0.741         | 19  | 28              | Mammal (L) | Endotherm | Rezende et al., 2004         |
| MMR      | 0.312         | 20  | 28              | Mammal (L) | Endotherm | Rezende et al., 2004         |
| MMR      | 0.572         | 20  | 56              | Mammal (L) | Endotherm | Rezende et al., 2004         |
| MMR      | 0.551         | 20  | 28              | Mammal (L) | Endotherm | Rezende et al., 2004         |
| RMR      | 0.72          | 40  | 35              | Mammal (L) | Endotherm | Książek et al., 2004         |
| RMR      | 0.567         | 36  | 915             | Bird       | Endotherm | Rønning et al., 2005         |
| RMR      | 0.571         | 39  | 48              | Bird       | Endotherm | Rønning et al., 2005         |

|     |          |     |        |            |           |                             |
|-----|----------|-----|--------|------------|-----------|-----------------------------|
| MMR | 0.844    | 47  | 1      | Mammal (L) | Endotherm | Rezende et al., 2005        |
| MMR | 0.42     | 48  | 1      | Mammal (L) | Endotherm | Rezende et al., 2005        |
| MMR | 0.134    | 47  | 1      | Mammal (L) | Endotherm | Rezende et al., 2005        |
| MMR | 0.982    | 47  | 1      | Mammal (L) | Endotherm | Rezende et al., 2005        |
| MMR | 0.816    | 48  | 1      | Mammal (L) | Endotherm | Rezende et al., 2005        |
| MMR | -0.098   | 47  | 1      | Mammal (L) | Endotherm | Rezende et al., 2005        |
| RMR | 0.49     | 48  | 1      | Mammal (L) | Endotherm | Rezende et al., 2005        |
| RMR | 0.868    | 48  | 1      | Mammal (L) | Endotherm | Rezende et al., 2005        |
| RMR | 0.492706 | 66  | 2      | Mammal (W) | Endotherm | Sadowska et al., 2005       |
| RMR | 0.548447 | 284 | 2      | Mammal (W) | Endotherm | Sadowska et al., 2005       |
| RMR | 0.599836 | 87  | 2      | Mammal (W) | Endotherm | Sadowska et al., 2005       |
| RMR | 0.616453 | 222 | 2      | Mammal (W) | Endotherm | Sadowska et al., 2005       |
| MMR | 0.39342  | 116 | 2      | Mammal (W) | Endotherm | Sadowska et al., 2005       |
| MMR | 0.472356 | 284 | 2      | Mammal (W) | Endotherm | Sadowska et al., 2005       |
| MMR | 0.532445 | 87  | 2      | Mammal (W) | Endotherm | Sadowska et al., 2005       |
| MMR | 0.431666 | 222 | 2      | Mammal (W) | Endotherm | Sadowska et al., 2005       |
| MMR | 0.476033 | 116 | 2      | Mammal (W) | Endotherm | Sadowska et al., 2005       |
| MMR | 0.588353 | 66  | 2      | Mammal (W) | Endotherm | Sadowska et al., 2005       |
| MMR | 0.333231 | 284 | 2      | Mammal (W) | Endotherm | Sadowska et al., 2005       |
| MMR | 0.654189 | 87  | 2      | Mammal (W) | Endotherm | Sadowska et al., 2005       |
| MMR | 0.540366 | 222 | 2      | Mammal (W) | Endotherm | Sadowska et al., 2005       |
| RMR | 0.007    | 85  | 60.5   | Mammal (W) | Endotherm | Russell and Chappell, 2007  |
| RMR | 0.003    | 59  | 60.5   | Mammal (W) | Endotherm | Russell and Chappell, 2007  |
| RMR | 0.059    | 61  | 60.5   | Mammal (W) | Endotherm | Russell and Chappell, 2007  |
| RMR | 0.099    | 26  | 60.5   | Mammal (W) | Endotherm | Russell and Chappell, 2007  |
| RMR | 0.177    | 13  | 60.5   | Mammal (W) | Endotherm | Russell and Chappell, 2007  |
| RMR | 0.014    | 26  | 60.5   | Mammal (W) | Endotherm | Russell and Chappell, 2007  |
| RMR | 0.061    | 72  | 60.5   | Mammal (W) | Endotherm | Russell and Chappell, 2007  |
| RMR | 0.404    | 65  | 28     | Bird       | Endotherm | Broggi et al., 2009         |
| RMR | 0.356    | 93  | 154    | Bird       | Endotherm | Broggi et al., 2009         |
| RMR | 0.324    | 48  | 380    | Bird       | Endotherm | Broggi et al., 2009         |
| RMR | 0.77     | 22  | 25.01  | Mammal (W) | Endotherm | Larivée et al., 2010        |
| RMR | 0.77     | 11  | 23.3   | Mammal (W) | Endotherm | Larivée et al., 2010        |
| RMR | 0.09     | 27  | 192.2  | Mammal (W) | Endotherm | Larivée et al., 2010        |
| RMR | -0.001   | 15  | 195.34 | Mammal (W) | Endotherm | Larivée et al., 2010        |
| RMR | 0.72     | 12  | 192.1  | Mammal (W) | Endotherm | Larivée et al., 2010        |
| RMR | 0.55     | 13  | 12.5   | Mammal (W) | Endotherm | Szafrańska et al., 2007     |
| RMR | 0.07     | 19  | 16.8   | Mammal (W) | Endotherm | Szafrańska et al., 2007     |
| RMR | -0.099   | 22  | 142.3  | Mammal (W) | Endotherm | Bozinovic, 2007             |
| RMR | 0.34     | 43  | 5.4    | Mammal (W) | Endotherm | Boratyński and Koteja, 2009 |
| RMR | 0.23     | 99  | 56.4   | Mammal (W) | Endotherm | Boratyński and Koteja, 2009 |
| MMR | 0.34     | 54  | 5.4    | Mammal (W) | Endotherm | Boratyński and Koteja, 2009 |
| MMR | 0.21     | 107 | 56.4   | Mammal (W) | Endotherm | Boratyński and Koteja, 2009 |
| RMR | 0.143    | 72  | 30     | Bird       | Endotherm | Bouwhuis et al., 2011       |
| RMR | -0.05    | 55  | 91.5   | Bird       | Endotherm | Bouwhuis et al., 2011       |
| MMR | 0.9      | 11  | 0.083  | Bird       | Endotherm | Chappell et al., 1996       |
| MMR | 0.901    | 31  | 28     | Bird       | Endotherm | Chappell et al., 1996       |
| MMR | 0.93     | 30  | 56     | Bird       | Endotherm | Chappell et al., 1996       |
| MMR | 0.517    | 22  | 180    | Bird       | Endotherm | Chappell et al., 1996       |

RMR, resting metabolic rate; FMR, field metabolic rate; MMR, maximum metabolic rate; L, lab; W, wild.

## REFERENCES

- Artacho, P. and Nespolo, R. F.** (2009). Natural selection reduces energy metabolism in the garden snail, *Helix aspersa* (*Cornu aspersum*). *Evolution* **63**, 1044-1050.
- Bech, C., Langseth, I. and Gabrielsen, G. W.** (1999). Repeatability of basal metabolism in breeding female kittiwakes *Rissa tridactyla*. *Proc. R. Soc. Lond. B* **266**, 2161-2167.
- Berteaux, D., Thomas, D. W., Bergeron, J. M. and Lapierre, H. L.** (1996). Repeatability of daily field metabolic rate in female meadow voles (*Microtus pennsylvanicus*). *Funct. Ecol.* **10**, 751-759.
- Boratyński, Z. and Koteja, P.** (2009). The association between body mass, metabolic rates and survival of bank voles. *Funct. Ecol.* **23**, 330-339.
- Bouwhuis, S., Sheldon, B. C. and Verhulst, S.** (2011). Basal metabolic rate and the rate of senescence in the great tit. *Funct. Ecol.* **25**, 829-838.
- Bozinovic, F.** (2007). Long-term repeatability of body mass and body temperature (but not basal metabolism) in the free-ranging leaf-eared mouse. *Evol. Ecol. Res.* **9**, 547-554.
- Broggi, J., Hohtola, E., Koivula, K., Orell, M. and Nilsson, J.-Å.** (2009). Long-term repeatability of winter basal metabolic rate and mass in a wild passerine. *Funct. Ecol.* **23**, 768-773.

- Chappell, M. A. and Bachman, G. C.** (1995). Aerobic performance in Belding's ground squirrels (*Spermophilus beldingi*): variance, ontogeny, and the aerobic capacity model of endothermy. *Physiol. Zool.* **68**, 421-442.
- Chappell, M. A. and Rogowitz, G. L.** (2000). Mass, temperature and metabolic effects on discontinuous gas exchange cycles in eucalyptus-boring beetles (Coleoptera : Cerambycidae). *J. Exp. Biol.* **203**, 3809-3820.
- Chappell, M. A., Zuk, M. and Johnsen, T. S.** (1996). Repeatability of aerobic performance in red junglefowl: effects of ontogeny and nematode infection. *Funct. Ecol.* **10**, 578-585.
- Chappell, M. A., Garland, T., Jr, Rezende, E. L. and Gomes, F. R.** (2004). Voluntary running in deer mice: speed, distance, energy costs and temperature effects. *J. Exp. Biol.* **207**, 3839-3854.
- Fyhn, M., Gabrielsen, G. W., Nordoy, E. S., Moe, B., Langseth, I. and Bech, C.** (2001). Individual variation in field metabolic rate of kittiwakes (*Rissa tridactyla*) during the chick-rearing period. *Physiol. Biochem. Zool.* **74**, 343-355.
- Garland, J. T. and Else, P. L.** (1987). Seasonal, sexual and individual variation in endurance and activity metabolism in lizards. *Am. J. Physiol.* **252R**, 439-449.
- Garland, T., Jr and Bennett, A. F.** (1990). Quantitative genetics of maximal oxygen consumption in a garter snake. *Am. J. Physiol. Regul. Int. Comp. Physiol.* **259**, R986-R992.
- Hayes, J. P. and O'Conner, C. S.** (1999). Natural selection on thermogenic capacity of high-altitude deer mice. *Evolution* **53**, 1280-1287.
- Hayes, J. P., Garland, T., Jr and Dohm, M. R.** (1992). Individual variation in metabolism and reproduction of *Mus*: are energetics and life history linked? *Funct. Ecol.* **6**, 5-14.
- Hayes, J. P., Bible, C. A. and Boone, J. D.** (1998). Repeatability of mammalian physiology: evaporative water loss and oxygen consumption of *Dipodomys merriami*. *J. Mammal.* **79**, 475-485.
- Hörak, P., Saks, L., Ots, I. and Kollist, H.** (2002). Repeatability of condition indices in captive greenfinches (*Carduelis chloris*). *Can. J. Zool.* **80**, 636-643.
- Książek, A., Konarzewski, M. and Łapo, I.** (2004). Anatomic and energetic correlates of divergent selection for basal metabolic rate in laboratory mice. *Physiol. Biochem. Zool.* **77**, 890-899.
- Labocha, M. K., Sadowska, E. T., Baliga, K., Semer, A. K. and Koteja, P.** (2004). Individual variation and repeatability of basal metabolism in the bank vole, *Clethrionomys glareolus*. *Proc. R. Soc. Lond. B* **271**, 367-372.
- Lardies, M. A., Naya, D. E., Berríos, P. and Bozinovic, F.** (2008). The cost of living slowly: metabolism,  $Q_{10}$  and repeatability in a South American harvestman. *Physiol. Entomol.* **33**, 193-199.
- Larivée, M. L., Boutin, S., Speakman, J. R., McAdam, A. G. and Humphries, M. M.** (2010). Associations between over-winter survival and resting metabolic rate in juvenile North American red squirrels. *Funct. Ecol.* **24**, 597-607.
- Maciak, S. and Konarzewski, M.** (2010). Repeatability of standard metabolic rate (SMR) in a small fish, the spined loach (*Cobitis taenia*). *Comp. Biochem. Physiol.* **157A**, 136-141.
- Marais, E. and Chown, S. L.** (2003). Repeatability of standard metabolic rate and gas exchange characteristics in a highly variable cockroach, *Perisphaeria* sp. *J. Exp. Biol.* **206**, 4565-4574.
- Nespolo, R. F., Lardies, M. A. and Bozinovic, F.** (2003). Intrapopulational variation in the standard metabolic rate of insects: repeatability, thermal dependence and sensitivity ( $Q_{10}$ ) of oxygen consumption in a cricket. *J. Exp. Biol.* **206**, 4309-4315.
- Norin, T. and Malte, H.** (2011). Repeatability of standard metabolic rate, active metabolic rate and aerobic scope in young brown trout during a period of moderate food availability. *J. Exp. Biol.* **214**, 1668-1675.
- Rezende, E. L., Chappell, M. A. and Hammond, K. A.** (2004). Cold-acclimation in *Peromyscus*: temporal effects and individual variation in maximum metabolism and ventilatory traits. *J. Exp. Biol.* **207**, 295-305.
- Rezende, E. L., Chappell, M. A., Gomes, F. R., Malisch, J. L. and Garland, T., Jr** (2005). Maximal metabolic rates during voluntary exercise, forced exercise, and cold exposure in house mice selectively bred for high wheel-running. *J. Exp. Biol.* **208**, 2447-2458.
- Rogowitz, G. L. and Chappell, M. A.** (2000). Energy metabolism of eucalyptus-boring beetles at rest and during locomotion: gender makes a difference. *J. Exp. Biol.* **203**, 1131-1139.

- Rønning, B., Moe, B. and Bech, C.** (2005). Long-term repeatability makes basal metabolic rate a likely heritable trait in the zebra finch *Taeniopygia guttata*. *J. Exp. Biol.* **208**, 4663-4669.
- Russell, G. A. and Chappell, M. A.** (2007). Is BMR repeatable in deer mice? Organ mass correlates and the effects of cold acclimation and natal altitude. *J. Comp. Physiol. B* **177**, 75-87.
- Sadowska, E. T., Labocha, M. K., Baliga, K., Stanisiz, A., Wróblewska, A. K., Jagusiak, W. and Koteja, P.** (2005). Genetic correlations between basal and maximum metabolic rates in a wild rodent: consequences for evolution of endothermy. *Evolution* **59**, 672-681.
- Seppänen, E., Piironen, J. and Huuskonen, H.** (2010). Consistency of standard metabolic rate in relation to life history strategy of juvenile Atlantic salmon *Salmo salar*. *Comp. Biochem. Physiol.* **156A**, 278-284.
- Szafrańska, P. A., Zub, K. and Konarzewski, M.** (2007). Long-term repeatability of body mass and resting metabolic rate in free-living weasels, *Mustela nivalis*. *Funct. Ecol.* **21**, 731-737.
- Terblanche, J. S., Klok, C. J. and Chown, S. L.** (2004). Metabolic rate variation in *Glossina pallidipes* (Diptera: Glossinidae): gender, ageing and repeatability. *J. Insect Physiol.* **50**, 419-428.
